# Supplementary material
Source: PubMed Central journal article supplement (PMC5206770)
Supplement: Supp_Table1.pdf [file Supp_Table1.pdf]

## Supplementary Data

SUPPLEMENTARY TABLE S1. THE ANTIBODIES USED AND THEIR SOURCES ARE LISTED BELOW

| Antibody/Antigen                                   | Species    | Company                                      | Clone       | Dilutions    |                         |
|----------------------------------------------------|------------|----------------------------------------------|-------------|--------------|-------------------------|
|                                                    |            |                                              |             | Western blot | Immunostaining (IHC/IF) |
| Anti-Phospho-p70S6K (Thr <sup>389</sup> )          | Rabbit Po. | Cell signaling Technology <sup>1</sup>       |             | 1:1000       | 1:500                   |
| p70S6K                                             | Rabbit     | Cell Signaling Technology <sup>1</sup>       |             | 1:1000       | 1:500                   |
| Anti-phospho-S6 (Ser <sup>235, 236</sup> )         | Rabbit     | Cell Signaling Technology <sup>1</sup>       |             | 1:500        | 1:500                   |
| Phospho-mTOR (Ser <sup>2481</sup> )                | Rabbit     | Abcam <sup>2</sup>                           | # ab45996   | 1:200        | 1:350                   |
| FABP5                                              | Rabbit     | Protein Tech Group, Inc. <sup>3</sup>        | # 12348-1AP | NA           | 1:200                   |
| PCNA                                               | Rabbit     | Dako North America, Inc. <sup>4</sup>        | #A0067      |              | 1:200                   |
| PI3 Kinase (p110 $\alpha$ (C73F8))                 | Rabbit     | Cell Signaling Technology <sup>1</sup>       | # 4249      | 1:200        | 1:500                   |
| Phospho-Stat3 (Tyr705)                             | Rabbit     | Cell Signaling Technology <sup>1</sup>       | #9145       | 1:500        | 1:200                   |
| PathScan <sup>®</sup> Multiplex Western Cocktail I |            | Cell Signaling Technology <sup>1</sup>       | #5301       | 1:300        | NA                      |
| Phospho-S6(Ser <sup>235/236</sup> )                | Rabbit     | Cell Signaling Technology <sup>1</sup>       | #2211       | 1:500        | 1: 400                  |
| mTOR                                               | Rabbit     | Cell Signaling Technology <sup>1</sup>       |             | 1:300        | 1:250                   |
| Phospho-mTOR (Ser <sup>2448</sup> )                | Rabbit     | Cell Signaling Technology <sup>1</sup>       | #5536       | 1:200        | 1:500                   |
| Anti-phospho-Akt Thr <sup>308</sup>                | Rabbit     | Cell Signaling Technology <sup>1</sup>       | #13038      | 1:200        | 1:500                   |
| Phospho-Akt Ser <sup>473</sup>                     | Rabbit     | Cell Signaling Technology <sup>1</sup>       | #4060       | 1:300        | 1:250                   |
| Caspase-14                                         | Rabbit Po. | Imgenex, Novus Biologicals, LLC <sup>5</sup> | IMG-5713    | 1:1000       | 1:1000/100              |
| Filaggrin                                          | Mouse Mo.  | Novocastra Laboratories Ltd. <sup>6</sup>    | 15C10       | 1:200        | 1:200/                  |
| Keratin-1                                          | Rabbit Po. | Covance <sup>7</sup>                         | PRB-        | 1:1000       | 1:100                   |
| Keratin-10                                         | Rabbit Po. | Covance <sup>7</sup>                         | PRB-159P    | 1:1000       | 1:1000 and 1:500        |
| Involucrin                                         | Mouse Mo.  | NeoMarker <sup>8</sup>                       | SY5         | 1:1000       | 1:200                   |
| Transglutaminase-1                                 | Mouse Mo.  | Biomed. Technol., Inc. <sup>9</sup>          | BT-621      | 1:500        | 1:200                   |
| HRP donkey anti-goat IgG                           |            | Santa Cruz Biotech <sup>10</sup>             | Sc-2033     | 1:5000       | n.d.                    |
| $\beta$ -Actin                                     | Mouse      | Sigma Aldrich <sup>11</sup>                  | A5441       | 1:5000       | n.d.                    |
| Phospho-NF- $\kappa$ B/p65                         | Rabbit po  | Cell Signaling Technology <sup>1</sup>       |             | 1:500        | n.d.                    |
| Alexa Fluor 488                                    | Rabbit     | Invitrogen <sup>12</sup>                     |             |              | 1: 600                  |
| Alexa Fluor 594                                    | Mouse      | Invitrogen <sup>12</sup>                     |             |              | 1: 600                  |

<sup>1</sup>3 Trask Lane Danvers, MA.

<sup>2</sup>Cambridge, MA.

<sup>3</sup>Rosemont, IL.

<sup>4</sup>Real Carpinteria, CA.

<sup>5</sup>Littleton, CO.

<sup>6</sup>Newcastle upon Tyne, UK.

<sup>7</sup>Madison, WI.

<sup>8</sup>Fremont, CA.

<sup>9</sup>Stoughton, MA.

<sup>10</sup>Santa Cruz, CA.

<sup>11</sup>St. Louis, MO.

<sup>12</sup>Lake Placid, NY.

n.d., not determined.
